# Supplementary material for: Perinatal exposure to 4-nonylphenol can affect fatty acid synthesis in the livers of F1 and F2 generation rats
Source: Royal Society of Chemistry journal article supplement (doi:10.1039/c7tx00316a), 2018-01-01
Supplement: c7tx00316a1.pdf [file c7tx00316a1.pdf]

Supplemental Table 1. PCR primer sequences

| Gene name      | Forward:              | Reverse:              |
|----------------|-----------------------|-----------------------|
| <i>LPL</i>     | CCAGCTGGGCCTAACTTTGA  | GGAAAGTGCCTCCATTGGGA  |
| <i>FAS</i>     | GTGGAAGACACTGGCTCGAA  | TGGTACACTTTCCCGCTCAC  |
| <i>SREBP-1</i> | GGAGCCATGGATTGCACATTT | CCAGCATAGGGGGGCATCAAA |
| <i>PPAR-γ</i>  | TCAGCTCTGTGGACCTCTCC  | ACCCTTGCATCCTTCAGAAG  |
| <i>ERα</i>     | AAGCCAATCTGTACCTCGGC  | CTGGTGCAACAAGGCCATTC  |
| <i>36B4</i>    | CAGCAGGTGTTTGACAATGGC | TGAGGCAACAGTCGGGTAGC  |
